# Supplementary material
Source: HighWire-hosted journal article supplement (https://diabetes.diabetesjournals.org/content/suppl/2005/05/25/54.6.1706)
Supplement: pg1706OnlineAppendixMethodology.pdf [file pg1706OnlineAppendixMethodology.pdf]

**Primers sequences used in Taqman PCR and genotyping**

|                                    |       |                                 |
|------------------------------------|-------|---------------------------------|
| <b>Perilipin</b>                   | For   | TGGACCACCTGGAGGAAAAG            |
|                                    | Rev   | TTCGAAGGCGGGTAGAGATG            |
|                                    | Probe | 6CGGCTCTTCAATACCCTCCAGAAAA0     |
| <b>AP2</b>                         | For   | CACCGCAGACGACAGGAAG             |
|                                    | Rev   | GCACCTGCACCAGGGC                |
|                                    | Probe | 6TGAAGAGCATCATAACCCTAGATGGCGG0  |
| <b>LPL</b>                         | For   | TGGAGAAGCCATCCGTGTG             |
|                                    | Rev   | TCATGCGAGCACTTCACCAG            |
|                                    | Probe | 6TGCAGAGAGAGGACTCGGAGACGTGG0    |
| <b>Glut 4</b>                      | For   | ACTCATTCTTGGACGGTTCCTC          |
|                                    | Rev   | CACCCCGAAGATGAGTGGG             |
|                                    | Probe | 6TGGCGCCTACTCAGGGCTAACATCA0     |
| <b>PGC1<math>\alpha</math></b>     | For   | AACCACACCCACAGGATCAGA           |
|                                    | Rev   | CTCTTCGCTTTATTGCTCCATGA         |
|                                    | Probe | 6CAAACCCTGCCATTGTTAAGACCGAGAA0  |
| <b>Resistin</b>                    | For   | CCATCGACAAGAAGATCAAACAAG        |
|                                    | Rev   | CAGCAATTTAAGCCAATGTTCTTTAT      |
|                                    | Probe | 6TTCAACTCCCTGTTTCCAAATGC0       |
| <b>FAS</b>                         | For   | GCCAGACAGAGAAGAGGCA             |
|                                    | Rev   | CTGACTCGGGCAACTTCCC             |
|                                    | Probe | 6GGAGGAGGTGGTGATAGCCGGTATGTC0   |
| <b>UCP1</b>                        | For   | CCCGCTGGACACTGCC                |
|                                    | Rev   | ACCTAATGGTACTGGAAGCCTGG         |
|                                    | Probe | 6AAGTCCGCCTTCAGATCCAAGGTGAAG0   |
| <b>UCP2</b>                        | For   | GATCTCATCACTTTCCCTCTGGATA       |
|                                    | Rev   | CCCTTGACTCTCCCCTTGG             |
|                                    | Probe | 6CGCCAAGGTCCGGCTGCAGA0          |
| <b>UCP3</b>                        | For   | GGACCTCCTCACTTTTCCCC            |
|                                    | Rev   | CTGGGTTCTCCCCTTGGACT            |
|                                    | Probe | 6CCCACGGCCTTCTACAAAGGATTTGTG0   |
| <b>SREBP1c</b>                     | For   | GCCATGGATTGCACATTTGA            |
|                                    | Rev   | GGCCCGGGAAGTCACTG               |
|                                    | Probe | 6GACATGCTCCAGCTCATCAACAACCAAG0  |
| <b>PPAR<math>\alpha</math></b>     | For   | CCTCAGGGTACCACTAGGGAGT          |
|                                    | Rev   | GCCGAATAGTTCGCCGAAA             |
|                                    | Probe | 6CACGCATGTGAAGGCTGTAAGGGCTT0    |
| <b>PPAR<math>\delta</math></b>     | For   | TGTGTGGAGACCGGCGA               |
|                                    | Rev   | CGCAGAATGGTGTCTCTGGA            |
|                                    | Probe | 6GCCTCATGAATGTGCCCCAGGTAGAAG0   |
| <b>PPAR<math>\gamma</math>1</b>    | For   | TTTAAAAACAAGACTACCCTTTACTGAAATT |
|                                    | Rev   | AGAGGTCCACAGAGCTGATTC           |
|                                    | Probe | 6AGAGATGCCATTCTGGCCCCACCAACTT0  |
| <b>PPAR<math>\gamma</math>2</b>    | For   | GATGCACTGCCTATGAGCACTT          |
|                                    | Rev   | AGAGGTCCACAGAGCTGATTC           |
|                                    | Probe | 6AGAGATGCCATTCTGGCCCCACCAACTT0  |
| <b>PPAR sens (F1)</b>              | For   | CCAACCAATCTTTTGCAAGACATAGAC     |
| <b>ASC 306 (F2) PPAR antis (R)</b> | For   | AATGGCCGCTTTTCTGGATTCATCGAC     |
|                                    | Rev   | ACATGCAATTTACCCACACATGAGTG      |
| <b>DR1 5' short arm</b>            | For   | CATGCCGCCTGCGCCCTATTGATCATG     |
|                                    | Rev   | ATTAATGATGTAATTGCCAACTTCTC      |

### Generation of PPAR $\gamma$ 2 KO mice.

A genomic mouse PPAR $\gamma$ 2 clone was obtained from a 129 mouse strain P1 Artificial Chromosome (PAC) genomic library (RPCI mouse PAC library 21). A replacement targeting construct was created in which the PPAR $\gamma$ 2-specific exon B1 was replaced with a IRES $\beta$ GalMCNeo cassette (consisting of an internal ribosome entry site flanked at the 5' end with an artificially incorporated primer site used for PCR screening (DR1) and linked at the 3' end to a LacZ reporter gene carrying a polyadenylation signal; this was followed by a lox-P flanked promoted neomycin phosphotransferase selectable marker cassette). A fragment (1.17 kb) extending from intron B1 and containing the promoter P2, and a fragment (4.04 kb) that spans exon B1 through intron 1 were subcloned and used for the 5' homology arm and the 3' homology arm respectively. HSV tk genes were situated externally to both arms to allow negative selection against random integrations. The transcriptional orientation of the Neo gene was the same as the PPAR $\gamma$ 2 gene in the construct.

The linearized targeting vector was electroporated into 129S6/SvEv embryonic stem cells, selected with G418 and resistant clones isolated and expanded followed by genomic DNA extraction for PCR and Southern blot analysis (Fig. 1). Recombinant clones were identified by PCR using the DR1 primer located in the 5' region of the LacZ/Neo cassette, together with a primer external to the 5' short arm. Homologous recombination was verified by Southern blot analysis after digestion with Nsi I, SphI and Nco I enzymes (Fig. 1B). The targeted clone was injected into C57Bl/6 blastocysts. Chimaeric offspring were mated with 129/SvEv mice. Two lines of mice carrying the disrupted exon B1 of PPAR $\gamma$ 2 were bred and used for analysis. All experiments were performed following the generation of descendants, which were hybrids between the C57Bl/6 and 129/Sv strains. Genotyping was performed by multiplex PCR using standard protocols.

Lipid profiling methodology.

The WAT lipid analysis for normal diet fed mice was performed on 12 mice (6 PPAR $\gamma$ 2 KO and 6 wild type), using two replicates per sample. Approximately 50 mg of tissue was used per sample. Samples were homogenized in 300  $\mu$ l 0.9% NaCl and extracted with 2 ml CHCl<sub>3</sub>:MeOH (2:1). 15  $\mu$ l of homogenate was used for the LC/MS runs. The liquid chromatography was performed on Waters 2795 HPLC system, with the reverse-phase column C18 (Hypersil BDS, Agilent Technologies: 150x4.6mm, particle size 5  $\mu$ m, Temp 35°C). The solvent system used is as described in (1). Solvents used: H<sub>2</sub>O, ACN, 2-Propanol, DKM, Am. acetate 1M, HCOOH. Conditions: flow rate 0.8 ml/min and flow to MS 0.15ml/min. The mass spectrometry analyses were performed in Electro Spray Ionisation positive ion mode on a Quattro Micro triple quadrupole mass spectrometer (Micromass): Mass range m/z 250-1200, full scan mode (rate 2.3 s/scan), capillary voltage 4 kV, cone voltage 40 V, source temp. 130 °C, desolvation temp. 250°C, desolvation gas flow 900 l/h. The same conditions were used in tandem MS analyses (MS/MS) for targeted analyses of specific ions, with tissue-specific samples pooled and concentrated. The MS and MS/MS spectra were visually checked using the MassLynx software (Micromass). Details of the data processing methodology will be described elsewhere. In summary, the raw files from full scan MS runs were converted into the netCDF format. Peak detection was based on method described by (2). Each peak was described by its m/z value and retention time. Peak lists were then aligned based on the partial linear fit algorithm (3), modified to allow alignment of peaks described by two indices. Peaks were then filtered based on their profiles and intensity. Selected peaks were calibrated based on a statistical model as previously described for microarray data (4), with the difference that the method was applied to the whole dataset, not the subset of controls. After the data processing, the individual peak profiles were characterized by fold change (calculated as mean peak high

in KO mice vs. mean peak high in WT mice) and the  $t$  test statistic comparing means of KO and WT mice, with corresponding  $p$ - values. The data processing and statistical analysis methods were implemented using Matlab release 14 software (MathWorks, Inc.). Principal components analysis on normalized data was performed using the PLS\_Toolbox 3.0 software (Eigenvector Research, Inc.). Linear correlation networks were used to detect pattern of peaks with similar profiles, and the representative peaks from each cluster, based on statistical criteria and intensity, were selected for targeted MS/MS analyses. Each peak selected was checked against the raw MS data across different samples. For correlation network analysis, linear correlation was calculated between each pair of peak profiles (i.e. peak intensity values across all 12 mice). Each peak was represented as a node in a network. If the correlation value between the two nodes was over the threshold set to  $C > 0.90$ , they were connected by an edge. So obtained nodes and edges were then visualized as a network. The visualization tool was developed based on Tom Sawyer Visualization toolkit (Tom Sawyer, Inc.).

1. Clish CB, Davidov E, Oresic M, Plasterer TN, Lavine G, Londo T, Meys M, Snell P, Stochaj W, Adourian A, Zhang X, Morel N, Neumann E, Verheij E, Vogels JT, Havekes LM, Afeyan N, Regnier F, van der Greef J, Naylor S: Integrative biological analysis of the APOE\*3-leiden transgenic mouse. *Omic*s 8:3-13, 2004
2. Hastings CA, Norton SM, Roy S: New algorithms for processing and peak detection in liquid chromatography/mass spectrometry data. *Rapid Commun Mass Spectrom* 16:462-467, 2002
3. Vogels JTWE, Tas AC, Venekamp J, Greef Jvd: Partial linear fit : a new NMR spectroscopy preprocessing tool for pattern recognition applications. *Journal of Chemometrics* 10:425-438, 1996

4. Hartemink AJ, Gifford DK, Jaakkola TS, Young RA: Maximum likelihood estimation of optimal scaling factors for expression array normalization. *SPIE BiOS, San Jose, California.*, 2001
